# Supplementary material
Source: Springer Nature journal article supplement (https://www.springermedizin.de/resource/supplementary/12885_2010_2687_MOESM2_ESM.pdf/9461720)
Supplement: MOESM2 [file 9461720]

**50 patients**  
ceCT → PET/CT

**Concordant results**  
**between ceCT and PET/CT**

**36 patients**

**Suggest recurrence**

**28 patients**

**Suggest no recurrence**

**8 patients**

**Discordant results**  
**between ceCT and PET/CT**

**14 patients**

**Suggest recurrence by ceCT**  
**but no recurrence by PET/CT**

**7 patients**

**Suggest no recurrence by ceCT**  
**but recurrence by PET/CT**

**7 patients**

**Final**  
**Confirmation**

**Recurrence: 24**  
**No recurrence: 4**

**Recurrence: 2**  
**No recurrence: 6**

**Recurrence: 2**  
**No recurrence: 5**

**Recurrence: 6**  
**No recurrence: 1**
